# Supplementary material for: Structural, electronic and magnetic properties of metal–metal bonded dinuclear rhenium complexes bridged by organocyanide acceptor ligands
Source: Royal Society of Chemistry journal article supplement (doi:10.1039/b304509a), 2003-01-01
Supplement: b304509a.pdf [file b304509a.pdf]

Supplementary Material

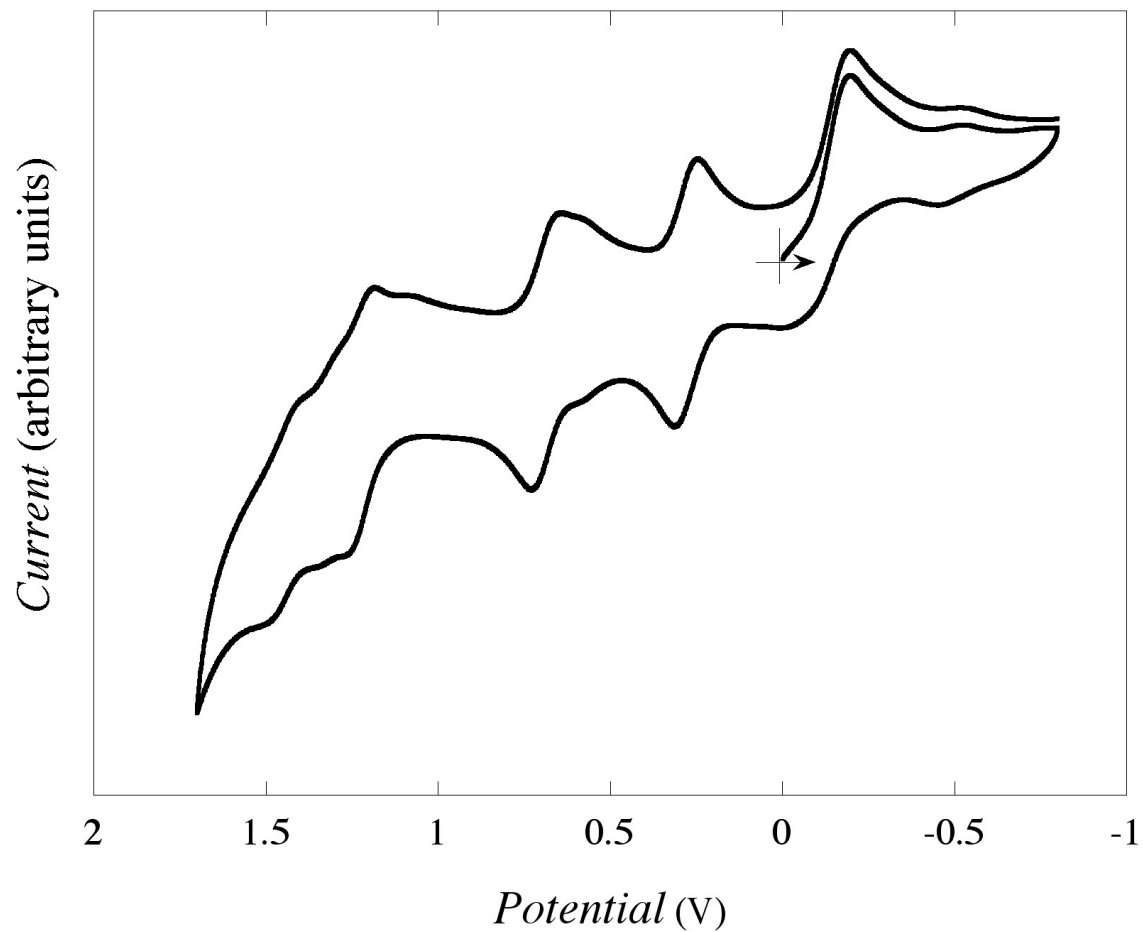

**Figure S1.** Cyclic voltammogram of **1** performed in 0.1 M [*n*-Bu<sub>4</sub>N][PF<sub>6</sub>] in CH<sub>2</sub>Cl<sub>2</sub> versus standard Ag/AgCl reference electrode.

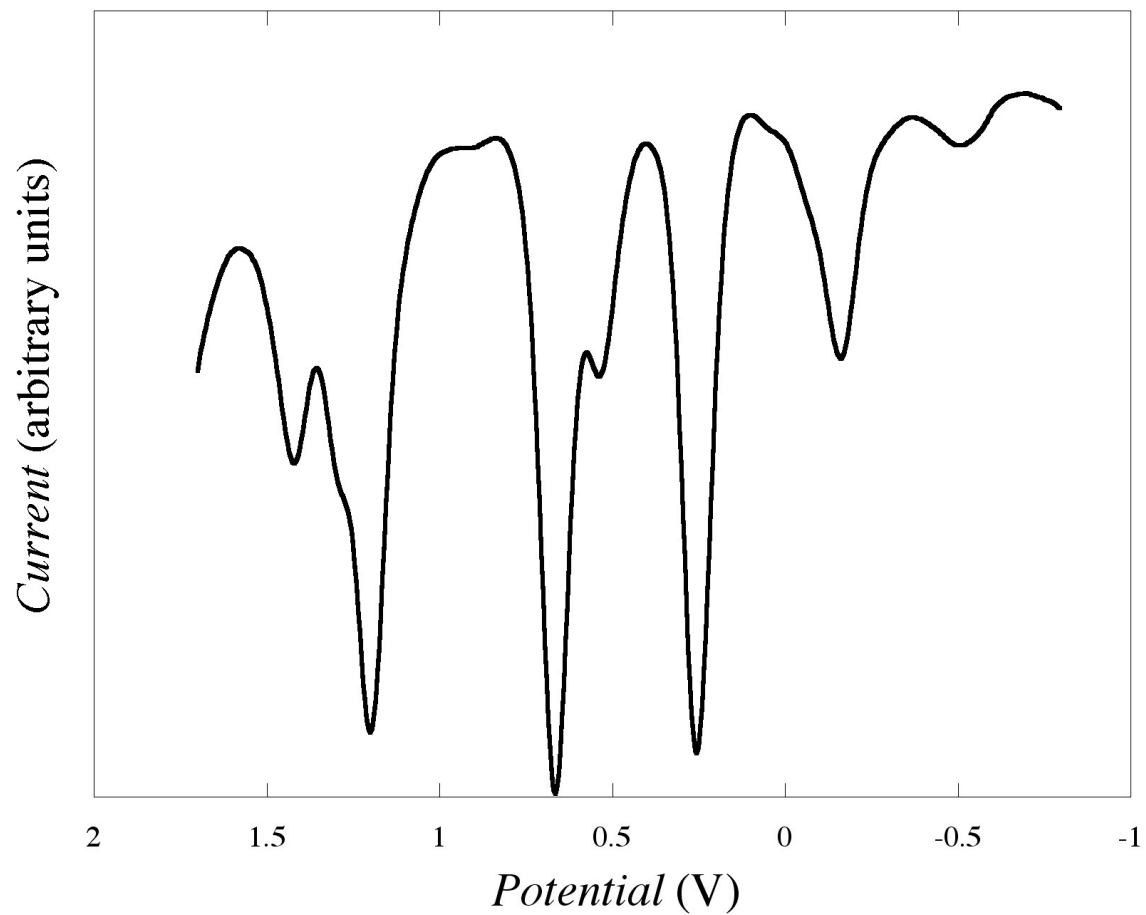

**Figure S2.** Differential pulse voltammogram of **1** performed in 0.1 M  $[n\text{-Bu}_4\text{N}][\text{PF}_6]$  in  $\text{CH}_2\text{Cl}_2$  versus standard Ag/AgCl reference electrode.

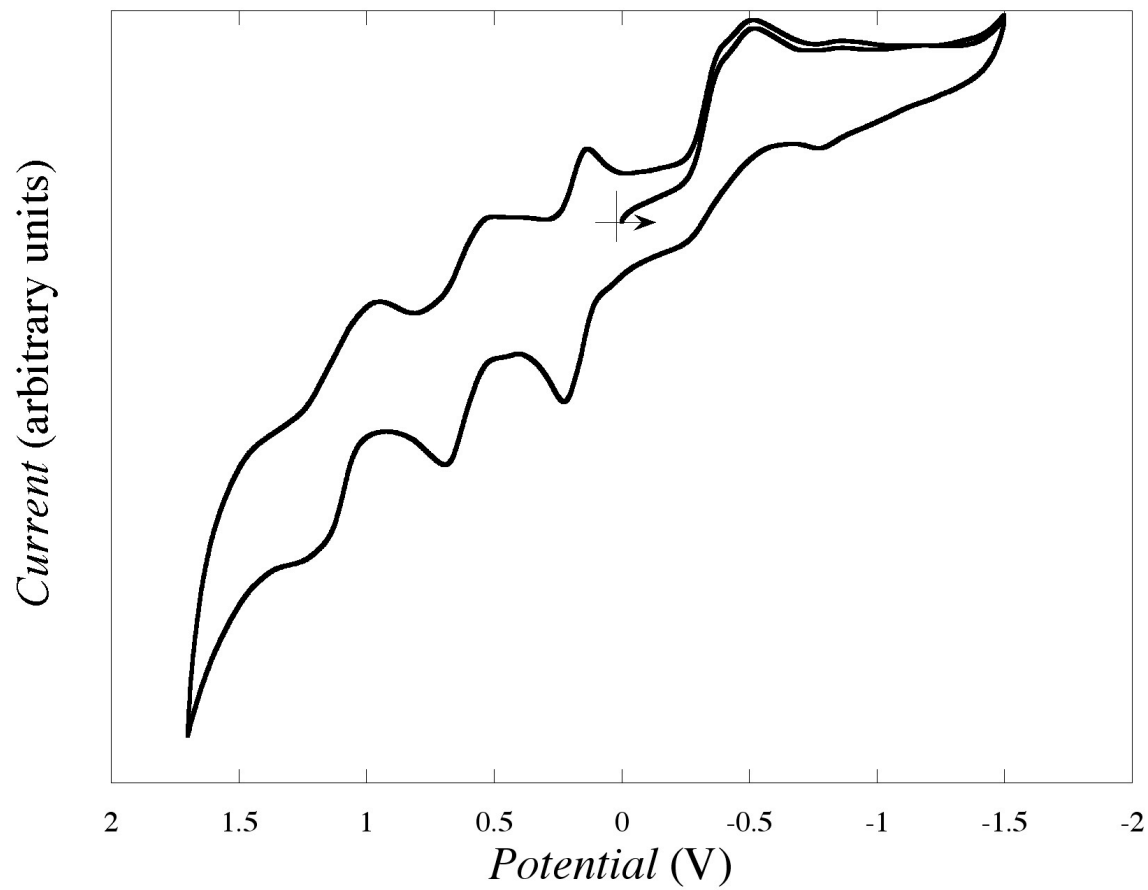

**Figure S3.** Cyclic voltammogram of **2** performed in 0.1 M [*n*-Bu<sub>4</sub>N][PF<sub>6</sub>] in CH<sub>2</sub>Cl<sub>2</sub> versus standard Ag/AgCl reference electrode.
